# Supplementary material for: Time-Restricted Eating Alters Food Intake Patterns, as Prospectively Documented by a Smartphone Application
Source: PubMed Central journal article supplement (PMC7694329; doi:10.3390/nu12113396), 2020-11-05
Supplement: nutrients-12-03396-s001.pdf [file nutrients-12-03396-s001.pdf]

**Supplemental Table S1:** Food categories and their nutrient properties as the base for categorization of eating occasions

| Category                                                                      | Origin                  | Food Examples                                                                                                                      | Nutrient/Energy density                          | Nutrients                                   |
|-------------------------------------------------------------------------------|-------------------------|------------------------------------------------------------------------------------------------------------------------------------|--------------------------------------------------|---------------------------------------------|
| Category a                                                                    | Animal origin           | Meat and meat products, fish and shellfish, poultry, egg, milk and cheese                                                          | <i>High nutrient density</i>                     | Animal protein and fat, iron, zinc, calcium |
| Category b                                                                    | Plant Origin            | Rice, pasta, bread, dried legumes, seeds, potatoes                                                                                 | <i>High nutrient density</i>                     | Starch, plant protein, dietary fibre        |
| Category c                                                                    | Plant origin            | Green vegetables, fruit, berries, roots                                                                                            | <i>High nutrient density, low energy density</i> | Starch, carotenoids, ascorbic acid          |
| Category d                                                                    | Plant origin            | Nuts, olives, avocado                                                                                                              | <i>High fat density</i>                          | Plant fat, plant protein                    |
| Category e                                                                    | Animal and plant origin | Cooking fat, spreads, cream, fatty sauces                                                                                          | <i>High fat density</i>                          | Fat                                         |
| Category f                                                                    | Plant origin            | Products in which white sugar often is added, beverages containing alcohol, ice cream, sweets, chocolate, biscuits, sweet desserts | <i>Low nutrient density</i>                      | Sugar, fat, alcohol                         |
| Category g                                                                    | ---                     | Water, coffee, tea, unsweetened light beverages                                                                                    | <i>No energy</i>                                 | No nutrients                                |
| <b><i>Categorization of EOs due to the combination of food categories</i></b> |                         |                                                                                                                                    |                                                  |                                             |
| Meal or snack                                                                 | Abbreviation            | Category of meal/snack                                                                                                             | Combination                                      | Example                                     |
| Meals                                                                         | CM                      | Complete meal                                                                                                                      | a+b+c                                            | Meat, potatoes or bread, carrots            |
|                                                                               | IM                      | Incomplete meal                                                                                                                    | a+b                                              | Meat, potatoes or bread                     |
|                                                                               | LM                      | Less balanced meal                                                                                                                 | a+c                                              | Meat, carrots                               |
|                                                                               | VM                      | Vegetarian meal                                                                                                                    | b+c                                              | Potatoes or bread, carrots                  |
| Snacks                                                                        | HS                      | High-quality snack                                                                                                                 | a or b or c                                      | An apple                                    |
|                                                                               | MS                      | Mixed-quality snack                                                                                                                | Any of a or b or c and/or d and/or e and/or f    | An apple and Some chocolate                 |
|                                                                               | LS                      | No-quality snack                                                                                                                   | e and/or f                                       | Some chocolate                              |
|                                                                               | NC                      | No-energy snack                                                                                                                    | g                                                | Coca cola light                             |

**Supplemental Table S2: Baseline characteristics of study participants <sup>a</sup>**

| <b>Characteristic <sup>b</sup></b>              | <b>TRE (n = 11)</b> | <b>non TRE (n = 9)</b> | <b>p-value</b> |
|-------------------------------------------------|---------------------|------------------------|----------------|
| Age (Years)                                     | 46.5 (12.4)         | 44.2 (12.3)            | 0.69           |
| Sex                                             | 9F/2M               | 8F/1M                  | 0.66           |
| Race (Black/White)                              | 0/11                | 3/6                    | <b>0.04</b>    |
| Ethnicity (Hispanic-Latino/non-Hispanic-Latino) | 2/9                 | 1/8                    | 0.66           |
| Weight (kg)                                     | 95.2 (22.6)         | 100.9 (28.1)           | 0.62           |
| BMI (kg/m <sup>2</sup> )                        | 33.8 (7.6)          | 34.4 (7.8)             | 0.86           |
| Systolic blood pressure (mmHg)                  | 132 (13.0)          | 123 (13)               | 0.14           |
| Diastolic blood pressure (mmHg)                 | 85 (4)              | 79 (8)                 | <b>0.04</b>    |
| Eating window (hours)                           | 15.2 (0.7)          | 15.5 (1.1)             | 0.47           |
| Fasting glucose (mg/dL)                         | 95 (10)             | 95 (13)                | 0.92           |
| Fasting insulin (mU/L)                          | 11 (6)              | 10 (5)                 | 0.84           |
| Hemoglobin A1c (%)                              | 5.4 (0.4)           | 5.6 (0.4)              | 0.46           |
| 2 hour OGTT glucose (mg/dL)                     | 142 (45)            | 96 (24)                | <b>0.01</b>    |
| HDL (mg/dL)                                     | 50 (14)             | 60 (18)                | 0.19           |
| Triglycerides (mg/dL)                           | 144 (54)            | 87 (21)                | <b>0.01</b>    |
| LDL (mg/dL)                                     | 95 (24)             | 105 (19)               | 0.31           |
| TSH (mU/L)                                      | 2.2 (0.8)           | 1.4 (0.6)              | <b>0.01</b>    |

<sup>a</sup> As the current paper is a secondary analysis, the baseline characteristics are summarized in Supplemental Table 2 for reader convenience. The full results were previously reported in Chow, L.S., et al., *Time-Restricted Eating Effects on Body Composition and Metabolic Measures in Humans who are Overweight: A Feasibility Study*. Obesity (Silver Spring), 2020. **28**(5): p. 860-869. <sup>b</sup> Continuous measures are reported as mean (SD). Categorical measures are reported as counts.

**Supplemental Table S3:** Correlation between weight loss and change in eating occasion, food types and beverages

|                        | TRE<br>(n = 11)                                            |                                                           | Non-TRE<br>(n = 9)                                         |                                                           |
|------------------------|------------------------------------------------------------|-----------------------------------------------------------|------------------------------------------------------------|-----------------------------------------------------------|
|                        | Absolute weight loss<br>correlation coefficient<br>p-value | Percent weight loss<br>correlation coefficient<br>p-value | Absolute weight loss<br>correlation coefficient<br>p-value | Percent weight loss<br>correlation coefficient<br>p-value |
| Eating occasion*       | 0.009<br>0.98                                              | 0.068<br>0.84                                             | 0.269<br>0.48                                              | 0.375<br>0.32                                             |
| <b>Food types*</b>     |                                                            |                                                           |                                                            |                                                           |
| Complete meal          | 0.441<br>0.17                                              | 0.579<br>0.06                                             | -0.080<br>0.84                                             | 0.043<br>0.91                                             |
| Incomplete meal        | -0.425<br>0.19                                             | -0.382<br>0.25                                            | -0.026<br>0.95                                             | -0.147<br>0.71                                            |
| Less balanced meal     | 0.042<br>0.90                                              | -0.082<br>0.81                                            | 0.067<br>0.86                                              | -0.006<br>0.99                                            |
| Vegetarian meal        | -0.384<br>0.24                                             | -0.377<br>0.25                                            | -0.183<br>0.64                                             | -0.243<br>0.53                                            |
| High quality snack     | 0.526<br>0.10                                              | 0.341<br>0.31                                             | 0.567<br>0.11                                              | 0.670<br><b>0.05</b>                                      |
| Mixed quality snack    | -0.602<br><b>0.05</b>                                      | -0.595<br><b>0.05</b>                                     | 0.289<br>0.45                                              | 0.275<br>0.47                                             |
| Low quality snack      | -0.226<br>0.50                                             | -0.118<br>0.73                                            | 0.087<br>0.82                                              | 0.184<br>0.63                                             |
| <b>Beverages*</b>      |                                                            |                                                           |                                                            |                                                           |
| Water                  | 0.279<br>0.41                                              | 0.240<br>0.48                                             | -0.088<br>0.82                                             | 0.020<br>0.96                                             |
| Caffeinated            | -0.246<br>0.47                                             | -0.112<br>0.74                                            | 0.420<br>0.26                                              | 0.440<br>0.24                                             |
| Sugary                 | -0.379<br>0.25                                             | -0.436<br>0.18                                            | 0.482<br>0.19                                              | 0.437<br>0.24                                             |
| Artificially sweetened | -0.090<br>0.79                                             | -0.139<br>0.68                                            | -0.200<br>0.61                                             | -0.169<br>0.66                                            |
| Dairy                  | -0.315<br>0.35                                             | 0.037<br>0.91                                             | -0.116<br>0.77                                             | 0.006<br>0.99                                             |
| Alcohol                | -0.008<br>0.98                                             | 0.110<br>0.75                                             | 0.117<br>0.76                                              | 0.055<br>0.89                                             |

\*Change in eating occasions, food types and beverages were calculated as the difference between T2 (end-intervention) and T0 (baseline). Pearson correlation coefficient was calculated by treatment group to evaluate the correlation between weight loss and change in eating frequency, food types and beverages
